# Supplementary material for: Peptide ligands that use a novel binding site to target both TGF-β receptors
Source: Royal Society of Chemistry journal article supplement (doi:10.1039/c0mb00115e), 2010-10-04
Supplement: c0mb00115e.pdf [file c0mb00115e.pdf]

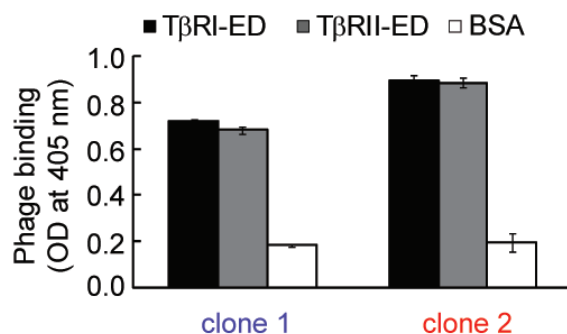

**Supplementary Fig. S1** Phage clone 1 and clone 2 display specificity for TβRI-ED and TβRII-ED over BSA.

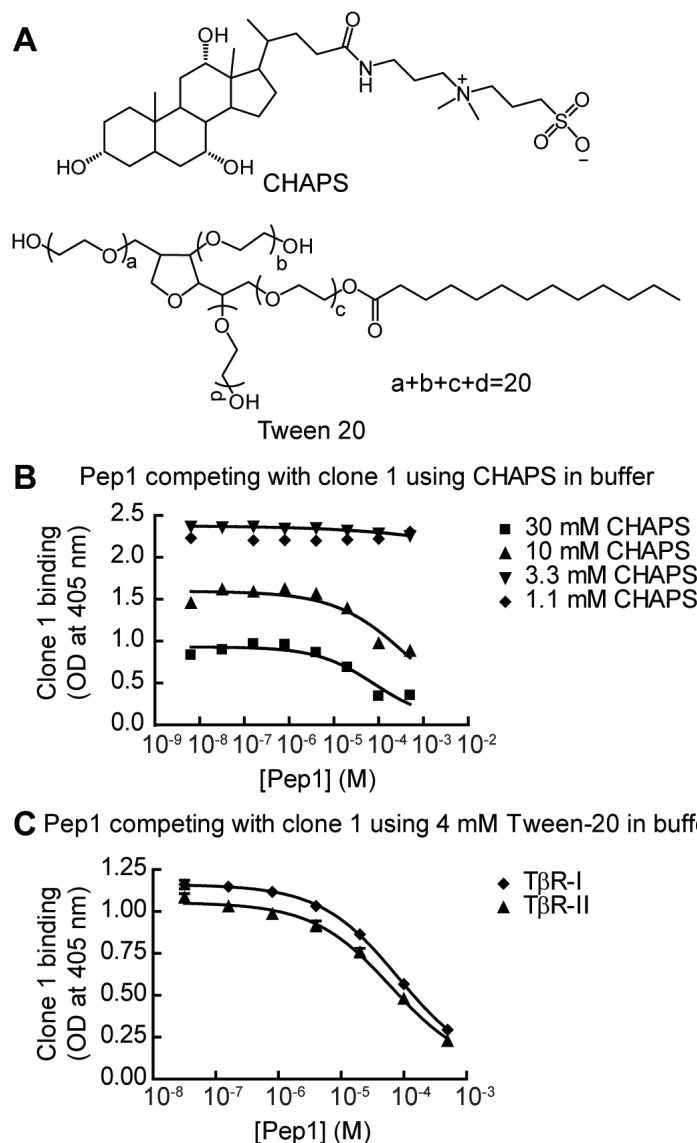

**Supplementary Fig. S2** Optimization of detergent additives for phage ELISA. (A) Structures of CHAPS and Tween-20. (B) Phage binding signals decrease with increasing CHAPS concentrations, indicating this detergent disrupts phage aggregation. The ability of Pep1 to compete clone 1 is enhanced as the CHAPS concentration is raised. (C) TBST containing 4 mM Tween-20 (0.5%) is optimal for this competition ELISA. Error bars represent the mean  $\pm$  the standard deviation in (B) and (C).

**A**

| Phage clones | $K_d$ phage (pM) |          |
|--------------|------------------|----------|
|              | TβRI-ED          | TβRII-ED |
| Clone 1      | 298 ± 5          | 334 ± 8  |
| Clone 2      | 45 ± 2           | 50 ± 2   |

**B**

| Synthetic peptides | $IC_{50}$ (μM) |          | $K_d$ (μM) |          |
|--------------------|----------------|----------|------------|----------|
|                    | TβRI-ED        | TβRII-ED | TβRI-ED    | TβRII-ED |
| Pep1               | 82 ± 4         | 62 ± 6   | 40 ± 2     | 33 ± 3   |
| Pep2               | 155 ± 15       | 141 ± 9  | 88 ± 10    | 83 ± 6   |

**Supplementary Table S1** (A) Apparent dissociation constants for the interaction of phage clones ( $K_d$  phage) with the immobilized extracellular domains of TβRI and TβRII. (B) Pep1, derived from clone 1, and Pep2, derived from clone 2, inhibit phage clones from binding to immobilized receptors. The  $IC_{50}$  values of Pep1 and Pep2 were determined, and dissociation constants ( $K_d$ ) were then derived using the Cheng-Prusoff equation:  $K_d = IC_{50}/(1+[phage]/K_d phage)$ . Standard deviations from three experimental replicates are shown.

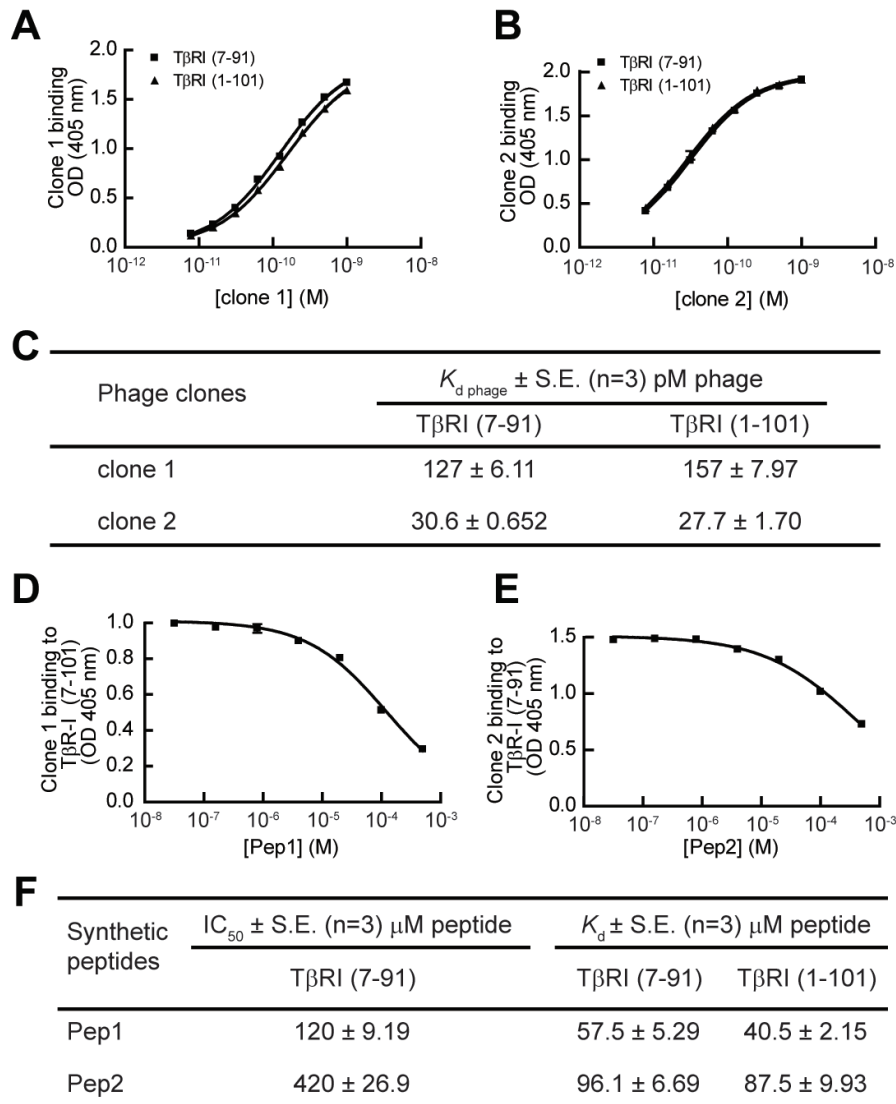

**Supplementary Fig. S3** The abilities of (A) phage clone 1 and (B) clone 2 to bind immobilized TβRI-ED (residue 7-91) and TβRI-ED (residue 1-101) were tested using a phage based ELISA. (C) Apparent dissociation constants for the interaction of phage clones ( $K_d$  phage) with immobilized TβRI-ED (residue 7-91) and TβRI-ED (residue 1-101). (D) ELISA-based competition binding assay. Pep1 derived from clone 1 and (E) Pep2 derived from clone 2 inhibit phage clones from binding to immobilized TβRI-ED (residues 7-91). (F) The  $IC_{50}$  values of Pep1 and Pep2 were determined, and their dissociation constants ( $K_d$ ) to TβRI-ED (residue 7-91) were derived using the Cheng-Prusoff equation:  $K_d = IC_{50}/(1+[phage]/K_d phage)$ . Standard deviations from three experimental replicates are shown.

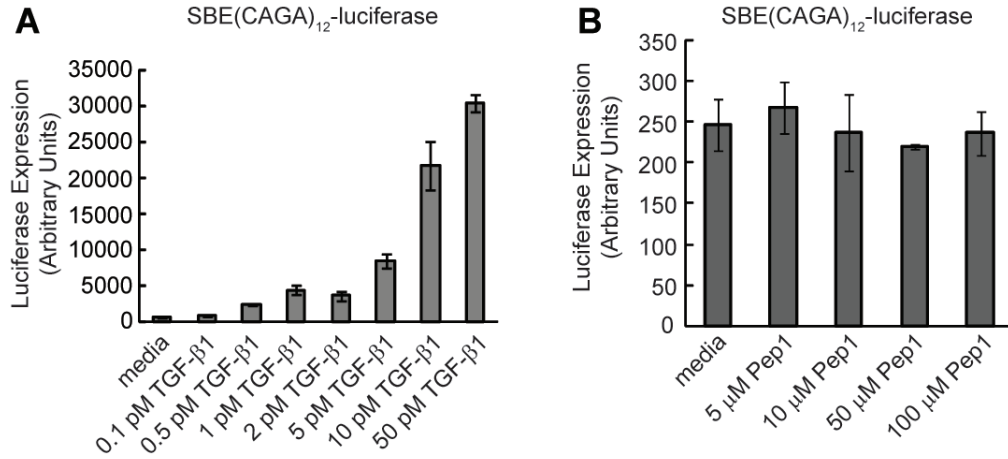

**Supplementary Fig. S4** (A) TGF-β1 treatment upregulates the reporter gene expression with an EC<sub>50</sub> value of ~10 pM. (B) Pep1 treatment alone does not initiate luciferase expression.

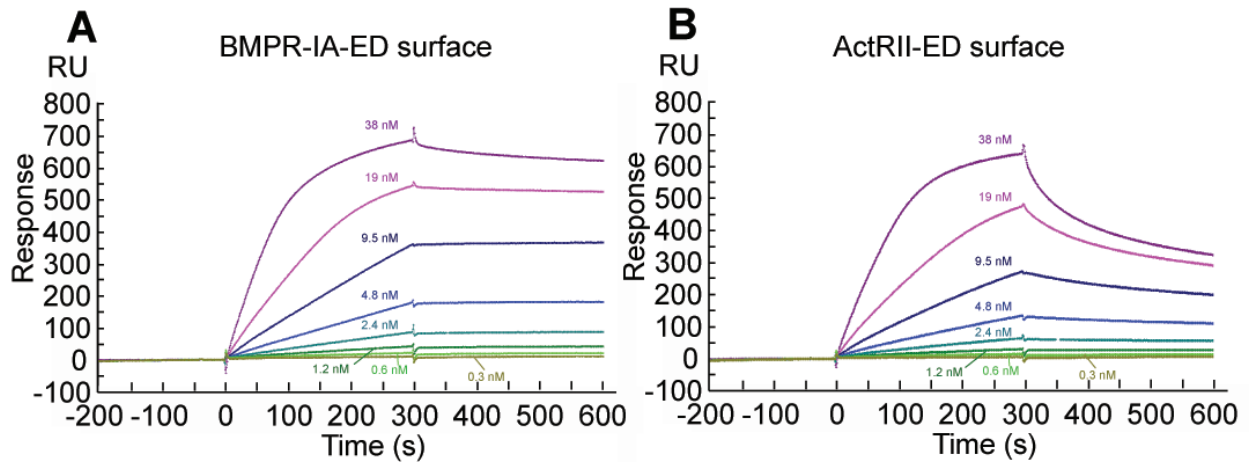

**Supplementary Fig. S5** (A) Binding of BMP-4 to BMPR-IA and (B) ActRII were assessed by SPR. All proteins were immobilized through their lysine residues. A protein-free flow cell was used as control. BMP-4 was injected to all flow cells at concentrations ranging from 0.6 nM to 38 nM. The dose-dependent response curves indicate that both receptors are active when immobilized on the SPR sensor chip.
